# Supplementary material
Source: PubMed Central journal article supplement (PMC7158917)
Supplement: mmc1.pdf [file mmc1.pdf]

# THE LANCET

## Supplementary appendix

Supplement to: Wang J, Xu C, Wong YK, et al. Preparedness is essential for malaria-endemic regions during the COVID-19 pandemic. *Lancet* 2020; published online March 16. [http://dx.doi.org/10.1016/S0140-6736\(20\)30561-4](http://dx.doi.org/10.1016/S0140-6736(20)30561-4).

This translation in Chinese was submitted by the authors and we reproduce it as supplied. It has not been peer reviewed. *The Lancet's* editorial processes have only been applied to the original in English, which should serve as reference for this manuscript.

此简体中文译文由作者提交，我方按照提供的版本刊登。此译文并未经过同行审阅。医学期刊《柳叶刀》的编辑流程仅适用于英文原稿，英文原稿应作为此手稿的参考。

## 做好应对2019冠状病毒病的准备对非洲疟疾流行区域至关重要

2019 冠状病毒病（COVID-19）疫情早期出现在中国湖北省武汉市，并迅速蔓延到了中国其他地区及世界其他国家<sup>1</sup>。在三个月内，全球已有十二万五千多人感染，到3月12日，死亡人数已超过4600人<sup>2</sup>。为了遏制病毒的传播，中国政府以及中国人民都做出了前所未有的努力，投入了大量的人力和物力来阻断疾病的传播<sup>3</sup>。在疟疾流行的非洲部分地区，截止2020年3月12日，尼日利亚，塞内加尔和刚果民主共和国已经报道了一些输入性病例<sup>2</sup>。鉴于该病毒具有很强的传染性，非洲部分国家和地区需要做好应对 COVID-19 的准备<sup>4</sup>，除了全球需共同保持警惕外，非洲部分国家和地区还需要考虑当地的疟疾疫情，采取必要的应对措施。

我们需要从 2014-2016 年西非埃博拉疫情中吸取教训。埃博拉病毒在几内亚、利比里亚和塞拉利昂等疟疾流行国家的出现，不仅导致了公共卫生紧急情况，还对正在进行的疟疾控制工作造成了影响。仅在几内亚，与没有埃博拉疫情的年份相比，卫生机构统计的寻求治疗的疟疾患者数量大约少了 74000 例<sup>5</sup>。这是由于埃博拉早期症状和疟疾的发热症状有些相似，导致早期诊断面临更大的困难，并且很多人由于担心在医疗机构会感染埃博拉病毒，致使很多疟疾患者不再去医疗机构寻求帮助而出现疟疾病例减少的假象。由于埃博拉病毒的出现使医疗保健基础设施不堪重负，这些地区控制疟疾的资源不足导致了疟疾发病率和死亡率的增加。在几内亚，与 2013 年报告的 108 起相比，2014 年官方报告的因疟疾死亡的人数为 1067 人（世卫组织估计：9428 人），而 2014 年埃博拉疫情的死亡人数为仅为 2446 人<sup>6</sup>。更令人担忧的是，由于埃博拉疫情爆发，几内亚、利比里亚和塞拉利昂增加了约 7000 名与疟疾有关的五岁以下儿童的死亡<sup>7</sup>。这些数字表明，面对新型传染病爆发的威胁，疟疾流行地区有着更加紧迫的危险。

尽管我们对 COVID-19 的认知仍然有限，目前来看，它是一种主要通过直接接触和吸入飞沫的在人与人之间传播的疾病。症状轻微或无症状的病毒携带者也可能具有传染性<sup>8</sup>。目前世界范围内，COVID-19 病毒已开始在意大利、伊朗和韩国等地开始局部爆发，这无疑增加了传播的风险。由于非洲国家的国际联系，不排除 COVID-19 在非洲大陆爆发疫情的可能<sup>9</sup>。与埃博拉病毒非常相似，COVID-19 的早期症状（包括发烧、肌痛和疲劳）有可能与疟疾混淆，导致早期临床诊断面临挑战<sup>1</sup>。COVID-19 的特点以及埃博拉疫情暴发的经验表明，疟疾流行国家需要急切的采取预防措施，以应对 COVID-19 的威胁及其对现有疟疾控制工作可能产生的影响。中国及其他受疫情影响的国家目前采取的严密遏制措施和高水平的研究为阻止疫情的更大蔓延带来了宝贵的时间窗口，我们建议其他地区，尤其是疟疾疫区要充分的利用这一时间窗口来采取防护措施。

COVID-19 爆发以来，世界卫生组织时刻监测着病毒的蔓延及其进化，且建议疟疾流行地区需要建立及时有效的防控机制。有效预防新型冠状病毒感染的方法除了注意个人卫生外，还需要对感染者和接触者进行密切追溯和观察。非洲的疟疾流行国家，在 COVID-19 出现时，公共卫生系统可能会面临潜在挑战，因此要考虑加强疟疾的防控。在 2014 年伊波拉病毒爆发时，尤其埃博拉疫情影响了药浸蚊帐的分发，在几内亚，利比里亚和塞拉利昂地区疟疾的感染病例就增加了一百万<sup>10</sup>。政府要努力，如果万一 COVID-19 爆发，要能最大程度地减少疫情对医疗资源的压力。在疫情期间，应尽可能优化资源的分配，以确保 COVID-19 防控过程中，不会忽略或降低对疟疾的防控。我们建议提前贮存外科口罩和其他防护设备，同时医务人员需要接受充分的培训。在紧急情况下，可以考虑在疫情大流行地区短期内使用群体服药措施和发放药浸蚊帐来阻止疟疾的爆发。这些措施可以减少医疗资源的负担并最大程度地减少诊断中的干扰因素，以加强 COVID-19 的防控工作。依照世卫组织的疟疾防控指南，塞拉利昂（2014-2015 年）和刚果民主共和国（2018 年）在伊波拉疫情暴发期间就运用过群体服药措施（抗疟药）来应对疫情<sup>11,12</sup>。疫情中，在非洲的疟疾高发区域，发热监控也要考虑疟疾的可能性，包括某些新

型肺炎病例或疑似病例罹患疟疾的可能。医疗机构应充分储备诸如青蒿素类抗疟药物。尽早向大众宣传预防感染方案，包括保持人与人之间的距离，戴口罩，如有不适应及时寻求医疗帮助等举措。以上各措施需要非洲国家团结一致，齐心协力。

尽管 COVID-19 在疟疾流行地区爆发可能并不会发生，但我们必须谨慎对待，以积极的态度面对疟疾流行地区可能到来的肺炎疫情。做好准备是应对任何公共卫生危机的关键，非洲疟疾高发国家和地区应该特别关注应对 COVID-19 可能带来的挑战，同时尽量减少对疟疾控制的影响。

作者们声明没有利益冲突。

*Jigang Wang, Chengchao Xu, Yin Kwan Wong, Yingke He, Ayôla A Adegnika, Peter G Kreamsner, Selidji T Agnandji, Amadou A Sall, Zhen Liang, Chen Qiu, Fu Long Liao, Tingliang Jiang, Sanjeev Krishna, \*Youyou Tu*

**\*yytu@icmm.ac.cn**

Shenzhen People's Hospital, Shenzhen 510515, China (JW, CX, YW, ZL, CQ); Artemisinin Research Center and the Institute of Chinese Materia Medica, China Academy of Chinese Medical Sciences, Beijing 100070, China (JW, CX, YW, FLL, TJ, YT); Department of Anaesthesiology, Singapore General Hospital, Singapore (YH); Institut für Tropenmedizin, Universitätsklinikum Tübingen, Tübingen, Germany (AAA, PGK, MA, SK); Centre de Recherches Médicales de Lambaréné, Lambaréné, Gabon (AAA, PGK, STA, SK); Institut Pasteur de Dakar, Dakar, Sénégal (AAS); Centre for Diagnostics and Antimicrobial Resistance, Institute for Infection Immunity, St. George's University of London, London, UK (SK); and St George's University Hospitals NHS Foundation Trust, London, UK (SK)

- 1 Zhu N, Zhang D, Wang W, et al. A novel coronavirus from patients with pneumonia in China, 2019. *N Engl J Med* 2020; **382**: 727–33.
- 2 WHO. Coronavirus disease 2019 (COVID-19) situation report—45. March 5, 2020. [https://www.who.int/docs/default-source/coronaviruse/situation-reports/20200305-sitrep-45-covid-19.pdf?sfvrsn=ed2ba78b\\_2](https://www.who.int/docs/default-source/coronaviruse/situation-reports/20200305-sitrep-45-covid-19.pdf?sfvrsn=ed2ba78b_2) (accessed March 4, 2020).
- 3 World Health Organization. Report of the WHO-China Joint Mission on Coronavirus Disease 2019 (COVID-19). 2020.
- 4 Nkengasong JN, Mankoula W. Looming threat of COVID-19 infection in Africa: act collectively, and fast. *Lancet* 2020; published online Feb. DOI:10.1016/S0140-6736(20)30464-5.

- 5 Plucinski MM, Guilavogui T, Sidikiba S, et al. Effect of the Ebola-virus-disease epidemic on malaria case management in Guinea, 2014: a cross-sectional survey of health facilities. *Lancet Infect Dis* 2015; **15**: 1017–23.
- 6 WHO. World malaria report 2015. Geneva: World Health Organization, 2015.
- 7 Parpia AS, Ndeffo-Mbah ML, Wenzel NS, Galvani AP. Effects of response to 2014–2015 Ebola outbreak on deaths from malaria, HIV/AIDS, and tuberculosis, West Africa. *Emerg Infect Dis* 2016; **22**: 433–41.
- 8 Hoehl S, Berger A, Kortenbusch M, et al. Evidence of SARS-CoV-2 infection in returning travelers from Wuhan, China. *N Engl J Med* 2020; published online Feb 18. DOI: 10.1056/NEJMc2001899.
- 9 Gilbert M, Pullano G, Pinotti F, et al. Preparedness and vulnerability of African countries against importations of COVID-19: a modelling study. *Lancet* 2020; published online Feb 19. [https://doi.org/10.1016/S0140-6736\(20\)30411-6](https://doi.org/10.1016/S0140-6736(20)30411-6).
- 10 Walker PGT, White MT, Griffin JT, Reynolds A, Ferguson NM, Ghani AC. Malaria morbidity and mortality in Ebola-affected countries caused by decreased health-care capacity, and the potential effect of mitigation strategies: a modelling analysis. *Lancet Infect Dis* 2015; **15**: 825–32.
- 11 Aregawi M, Smith SJ, Sillah-Kanu M, et al. Impact of the Mass Drug Administration for malaria in response to the Ebola outbreak in Sierra Leone. *Malar J* 2016; **15**: 480.
- 12 WHO. Malaria control campaign launched in Democratic Republic of the Congo to save lives and aid Ebola response. Nov 28, 2018. <https://www.who.int/malaria/news/2018/malaria-control-campaign-drc/en/> (accessed March 4, 2020).
